# Supplementary material for: Molecular classification of the placebo effect in nausea
Source: PLOS journal article supplement (doi:10.1371/journal.pone.0238533), 2020-09-23
Supplement: S8 (10.1371/journal.pone.0238533.s008) [file journal.pone.0238533.s008]

**S6 Table: Enriched groups of proteins for which a significant amount of variance could be explained by the factors ‘group’, ‘sex’, by ‘DAS-MS’, or by any of the interaction terms.**

| P-value | GO group                                                                         | Gene Names                                                    |
|---------|----------------------------------------------------------------------------------|---------------------------------------------------------------|
| 0.002   | adult behavior                                                                   | NRXN1 SHANK1                                                  |
| 0.002   | vocal learning                                                                   | HTT NRXN1                                                     |
| 0.002   | negative regulation of catalytic activity                                        | ANXA2 RNH1 PHACTR1                                            |
| 0.004   | vesicle-mediated transport                                                       | OSBPL1A KIF17 MYO5B                                           |
| 0.004   | neutrophil degranulation                                                         | CEP290 CFD A1BG GSN S100A9 ANXA2 S100A7 ABCA13 SERPINB12 BIN2 |
| 0.004   | protein destabilization                                                          | GSN HTT                                                       |
| 0.004   | vocalization behavior                                                            | NRXN1 SHANK1                                                  |
| 0.004   | amyloid fibril formation                                                         | GSN MAPT                                                      |
| 0.009   | positive regulation of neurogenesis                                              | SERPINF1 SPEN                                                 |
| 0.009   | interaction with symbiont                                                        | PLG DDB1                                                      |
| 0.009   | positive regulation of excitatory postsynaptic potential                         | NRXN1 SHANK1                                                  |
| 0.012   | transcription, DNA-templated                                                     | ENO1 TXN NRIP1 ZNF438 DDX54 SPEN BRMS1                        |
| 0.014   | activation of cysteine-type endopeptidase activity involved in apoptotic process | S100A9 MAPT                                                   |
| 0.014   | social behavior                                                                  | NRXN1 SHANK1                                                  |
| 0.014   | tissue regeneration                                                              | PLG GSN                                                       |
| 0.014   | cellular response to retinoic acid                                               | KRT13 SERPINF1                                                |
| 0.014   | negative regulation of gene expression                                           | MAPT SERPINF1 SLC35C2                                         |
| 0.017   | fibrinolysis                                                                     | PLG HRG ANXA2                                                 |
| 0.017   | antimicrobial humoral immune response mediated by antimicrobial peptide          | HRG S100A9 S100A7                                             |
| 0.018   | negative regulation of transcription from RNA polymerase II promoter             | ENO1 TXN NRIP1 SPEN BRMS1                                     |
| 0.020   | response to radiation                                                            | TXN KRT13                                                     |
| 0.027   | negative regulation of fibrinolysis                                              | PLG HRG                                                       |
| 0.030   | positive regulation of transcription, DNA-templated                              | CEP290 SPP1 NRIP1 SKAP1                                       |
| 0.031   | DNA repair                                                                       | ATR DDB1 POLI                                                 |
| 0.034   | RNA processing                                                                   | DDX54 ADAD1                                                   |
| 0.034   | peptidyl-serine phosphorylation                                                  | ATR RICTOR                                                    |
| 0.034   | negative regulation of cell growth                                               | HRG ENO1                                                      |
| 0.034   | neuromuscular process controlling balance                                        | NRXN1 SHANK1                                                  |
| 0.042   | regulation of gene expression                                                    | HRG RICTOR                                                    |
| 0.042   | actin cytoskeleton reorganization                                                | RICTOR PHACTR1                                                |
| 0.044   | aging                                                                            | GSN VCAM1 SERPINF1                                            |
| 0.048   | extracellular matrix disassembly                                                 | PLG GSN SPP1                                                  |

Note: Significant GO groups with single genes were omitted.

Abbreviations: DAS-MS, day-adjusted scores of motion sickness.
