# Supplementary material for: Molecular classification of the placebo effect in nausea
Source: PLOS journal article supplement (doi:10.1371/journal.pone.0238533), 2020-09-23
Supplement: S11 (10.1371/journal.pone.0238533.s011) [file journal.pone.0238533.s011]

**S9 Table: Significant Gene enrichment (GO) terms and related proteins resulting from GO enrichment analyses on 74 proteins differentially regulated in the placebo and control groups.** For list of 74 proteins, see S8 Table.

| Gene enrichment (GO) terms                                                              | P-value (FDR-corr.) | Gene Names                                                                       |
|-----------------------------------------------------------------------------------------|---------------------|----------------------------------------------------------------------------------|
| platelet degranulation                                                                  | 0.022               | A2M, APOA1, FGA, FGB, FGG, ORM1, AHSG, TF                                        |
| positive regulation of substrate adhesion-dependent cell spreading                      | 0.008               | APOA1, FGA, FGB, FGG                                                             |
| vitamin transport                                                                       | 0.047               | APOA1, GC                                                                        |
| positive regulation of lipid storage                                                    | 0.022               | C3, APOB                                                                         |
| hydrogen peroxide catabolic process                                                     | 0.010               | CAT, PRDX2, HBB, HBA1                                                            |
| cellular protein metabolic process                                                      | 0.000               | CP, C3, APOA1, FGA, FGG, AHSG, TF, PROC, APOB, SERPIND1, C4A, IGFALS, LYZ, LTBP1 |
| post-translational protein modification                                                 | 0.000               | CP, C3, APOA1, FGA, FGG, AHSG, TF, PROC, APOB, SERPIND1, C4A, LTBP1              |
| blood coagulation, common pathway                                                       | 0.022               | F10, FGA                                                                         |
| blood coagulation                                                                       | 0.002               | F10, FGA, FGB, FGG, PROC, SERPIND1, C4BPB, HBB                                   |
| induction of bacterial agglutination                                                    | 0.022               | FGA, FGB                                                                         |
| positive regulation of peptide hormone secretion                                        | 0.002               | FGA, FGB, FGG                                                                    |
| cellular protein complex assembly                                                       | 0.002               | FGA, FGB, FGG                                                                    |
| negative regulation of extrinsic apoptotic signaling pathway via death domain receptors | 0.005               | FGA, FGB, FGG                                                                    |
| positive regulation of heterotypic cell-cell adhesion                                   | 0.005               | FGA, FGB, FGG                                                                    |
| positive regulation of vasoconstriction                                                 | 0.005               | FGA, FGB, FGG                                                                    |
| blood coagulation, fibrin clot formation                                                | 0.010               | FGA, FGB, FGG                                                                    |
| positive regulation of exocytosis                                                       | 0.010               | FGA, FGB, FGG                                                                    |
| protein polymerization                                                                  | 0.010               | FGA, FGB, FGG                                                                    |
| plasminogen activation                                                                  | 0.022               | FGA, FGB, FGG                                                                    |
| negative regulation of endothelial cell apoptotic process                               | 0.039               | FGA, FGB, FGG                                                                    |
| toll-like receptor signaling pathway                                                    | 0.010               | FGA, FGB, FGG, APOB                                                              |
| platelet aggregation                                                                    | 0.038               | FGA, FGB, FGG, HBB                                                               |
| positive regulation of protein secretion                                                | 0.010               | FGA, FGB, FGG, PPIA                                                              |
| response to hydrogen peroxide                                                           | 0.004               | HP, CAT, HBB, HBA1                                                               |
| cellular oxidant detoxification                                                         | 0.022               | HP, CAT, HBB, HBA1                                                               |
| positive regulation of cell death                                                       | 0.018               | HP, HBB, HBA1                                                                    |
| acute-phase response                                                                    | 0.038               | HP, ORM1, AHSG, CD163                                                            |
| regulation of complement activation                                                     | 0.011               | IGLC7, C3, C5, IGHV3-23, IGHG2, IGHG3, C1QC, CFH, C4A, C4BPB                     |
| complement activation                                                                   | 0.022               | IGLC7, C3, C5, IGHV3-23, IGHG2, IGHG3, C1QC, CFH, C4A                            |
| innate immune response                                                                  | 0.047               | IGLC7, IGHV3-23, IGHG2, IGHG3, FGA, FGB, C1QC, C4A, C4BPB                        |
| protein heterooligomerization                                                           | 0.039               | JUP, HBB, HBA1                                                                   |
| negative regulation of endopeptidase activity                                           | 0.001               | PAPLN, A2M, C3, C5, AHSG, SERPIND1, C4A, PZP, SERPINB12                          |
| neutrophil degranulation                                                                | 0.005               | RAB3D, HP, C3, ORM1, AHSG, CAT, HSPA8, JUP, LYZ, PPIA, HBB, SERPINB12            |
