# Supplementary material for: Molecular classification of the placebo effect in nausea
Source: PLOS journal article supplement (doi:10.1371/journal.pone.0238533), 2020-09-23
Supplement: S12 (10.1371/journal.pone.0238533.s012) [file journal.pone.0238533.s012]

**S10 Table: Significant prediction of DAS-Nausea, DAS-MS, and DAS-NTT in the placebo and control groups by protein fold changes of significantly enriched GO terms.**  
For GO terms, see S9 Table.

| Gene enrichment (GO) term                                             | DAS-<br>Nau<br>Ctrl     | DAS-<br>MS<br>Ctrl | DAS-<br>NTT<br>Ctrl | DAS-<br>Nau<br>Plc | DAS-<br>MS<br>Plc | DAS-<br>NTT Plc | Proteins                                                    |
|-----------------------------------------------------------------------|-------------------------|--------------------|---------------------|--------------------|-------------------|-----------------|-------------------------------------------------------------|
|                                                                       | P-value (FDR-corrected) |                    |                     |                    |                   |                 |                                                             |
| Placebo group                                                         |                         |                    |                     |                    |                   |                 |                                                             |
| acute-phase response                                                  | 0.140                   | 0.781              | 0.336               | 0.003              | 0.771             | 0.297           | HP, ORM1, AHSG, CD163                                       |
| blood coagulation,<br>common pathway                                  | 0.103                   | 0.560              | 0.400               | 0.807              | 0.331             | 0.023           | FGA                                                         |
| induction of bacterial agglutination                                  | 0.178                   | 0.515              | 0.268               | 0.943              | 0.321             | 0.015           | FGA, FGB                                                    |
| positive regulation of peptide<br>hormone secretion                   | 0.241                   | 0.665              | 0.370               | 0.896              | 0.312             | 0.038           | FGA, FGB, FGG                                               |
| platelet aggregation                                                  | 0.308                   | 0.821              | 0.383               | 0.710              | 0.238             | 0.020           | FGA, FGB, FGG, HBB                                          |
| blood coagulation                                                     | 0.445                   | 0.226              | 0.533               | 0.598              | 0.360             | 0.050           | FGA, FGB, FGG,<br>SERPIND1, HBB                             |
| complement activation                                                 | 0.063                   | 0.164              | 0.804               | 0.706              | 0.698             | 0.026           | C3, C5, IGHV3_23, IGHG2,<br>IGHG3, C1QC, CFH, C4A,<br>IGLC7 |
| Control group                                                         |                         |                    |                     |                    |                   |                 |                                                             |
| positive regulation of substrate<br>adhesion-dependent cell spreading | 0.413                   | 0.000              | 0.492               | 0.952              | 0.706             | 0.019           | APOA1, FGA, FGB, FGG                                        |
| protein heterooligomerization                                         | 0.049                   | 0.006              | 0.540               | 0.404              | 0.095             | 0.072           | HBB, HBA1                                                   |
| positive regulation of cell death                                     | 0.110                   | 0.021              | 0.714               | 0.632              | 0.182             | 0.130           | HP, HBB, HBA1                                               |
| hydrogen peroxide catabolic process                                   | 0.087                   | 0.022              | 0.204               | 0.492              | 0.184             | 0.141           | CAT, HBB, HBA1                                              |

Abbreviations: DAS, day-adjusted scores; Nau, nausea; Ctrl, control group; MS, motion sickness score; NTT, normo-to-tachy-ratio; Plc, placebo group.
